# Supplementary material for: Pre-Exposure Prophylaxis (PrEP) Adherence Questionnaire: Psychometric Validation among Sexually Transmitted Infection Patients in China
Source: MDPI journal article supplement (doi:10.3390/ijerph182010980), 2021-10-19
Supplement: s1 [file s1]

## PrEP Adherence Questionnaire

Would you agree with the following statements about free oral pre-exposure prophylaxis (PrEP)? For each statement, please choose the option that best fits your situation.

| Item                                                                                       | disagree | unclear | agree |
|--------------------------------------------------------------------------------------------|----------|---------|-------|
| 1. PrEP can effectively reduce your risk of HIV infection.                                 |          |         |       |
| 2. This medication could reduce the risk of HIV transmission to your partner.              |          |         |       |
| 3*. The side effects of PrEP can affect your daily life.                                   |          |         |       |
| 4*. My partner would think I do not trust him/her, if they find me taking this medication. |          |         |       |
| 5. A lot of my friend would be willing to take PrEP.                                       |          |         |       |
| 6. My partner is supportive for me to take PrEP.                                           |          |         |       |
| 7. You are confident to use free PrEP if you want to.                                      |          |         |       |
| 8. It is up to me whether to take PrEP if PrEP is free to access.                          |          |         |       |

PS: The questionnaire included four scales: benefit, barrier, peer support and self-

efficacy. Benefit refers to perceived benefit when one take PrEP strategy, including item 1-2; Barrier refers to perceived barrier when one take PrEP strategy, including item 3-4; Peer support refers to support get from peers when one take PrEP strategy, including item 5-6; Self-efficacy refers to one 's belief in his/her own ability to take PrEP strategy, including item 7-8.

Each item on the questionnaire was scored using a three-point scale: 0 points for "disagree", 1 point for "unclear", and 2 points for "agree"; the total score on the questionnaire was 16 points. Asterisked items should be scored in reverse. Higher scores indicated higher adherence to PrEP.
